# Supplementary material
Source: publisher site journal article supplement (https://www.spandidos-publications.com/8254/downloadSupplementary)

Figure S1. Correlations between 24hUP and UPCR in the derivation cohort. (A) 24hUP vs. mUPCR; (B) 24hUP vs. UPCR adjusted by m24hUCr ( $eUPCR_0 = mUPCR \times m24hUCr$ ); (C-E) 24hUP vs. UPCR adjusted by e24hUCr using the Hellerstein ( $eUPCR_1$ ), Ghazali-Barratt ( $eUPCR_2$ ) and Cockcroft-Gault ( $eUPCR_3$ ) equations. UPCR, urine protein-creatinine ratio; 24hUP, 24-h urine protein; 24hUCr, 24-h urine creatinine; m, measured; e, estimated.

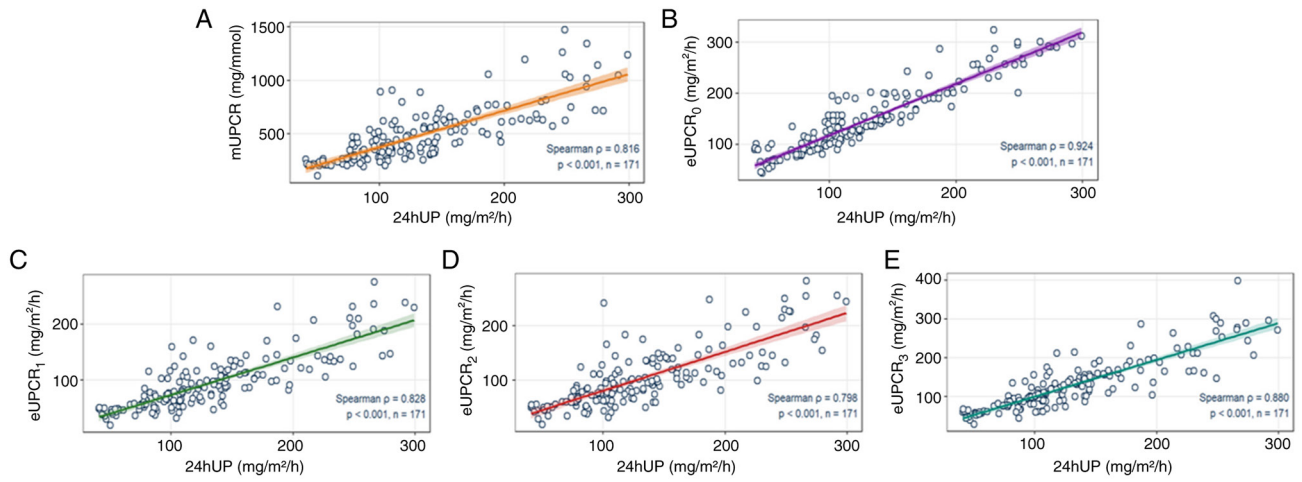

Figure S2. Bland-Altman agreements between 24hUP and UPcr in the derivation cohort. (A) 24hUP vs. mUPCR; (B) 24hUP vs. UPcr adjusted by m24hUCr ( $eUPCR_0 = mUPCR \times m24hUCr$ ); (C-E) 24hUP vs. UPcr adjusted by e24hUCr using the Hellerstein ( $eUPCR_1$ ), Ghazali-Barratt ( $eUPCR_2$ ), and Cockcroft-Gault ( $eUPCR_3$ ) equations. All values are  $\log_{10}$ -transformed. UPcr, urine protein-creatinine ratio; 24hUP, 24-h urine protein; 24hUCr, 24-h urine creatinine; m, measured; e, estimated.

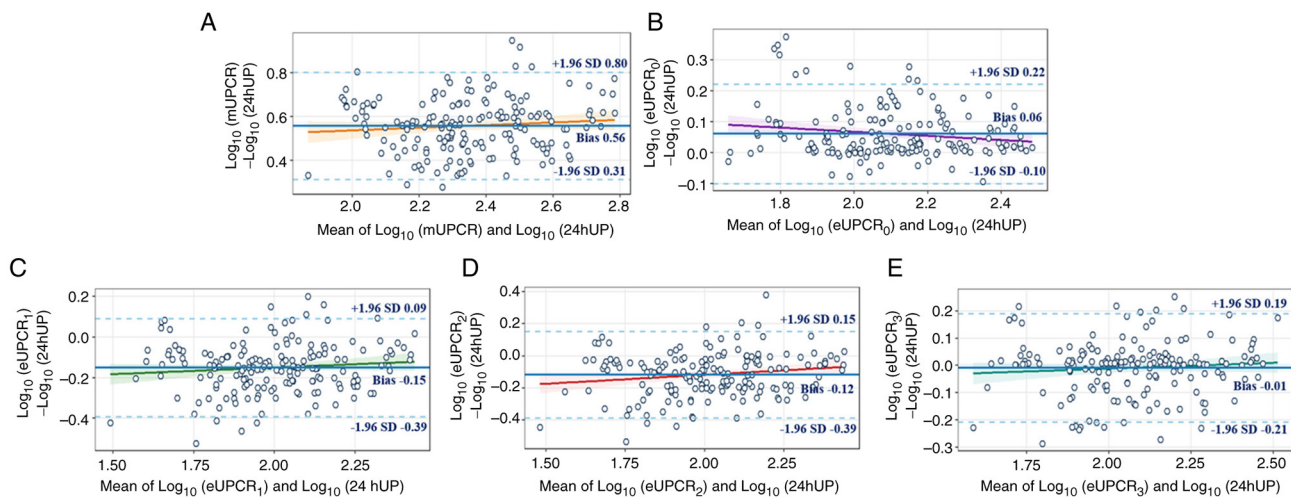

Figure S3. Residual diagnostics for model  $M_6$  ( $\text{Log}_{10}$ -scale). (A) Residuals vs. fitted ( $\text{log}_{10}$ -scale). Points scatter around 0; the LOESS curve is essentially flat with slight curvature near the center, indicating no obvious model misspecification and small residual amplitude. (B) Normal Q-Q (standardized residuals). Points lie close to the 45° line with only mild tail departures, approximately normal. For conservative inference, HC3 robust standard errors are used. (C) Scale-location.  $\sqrt{|\text{standardized residuals}|}$  decreases slightly and then stabilizes across fitted values, suggesting roughly constant variance; no clear ‘fan’ pattern, if heteroskedasticity exists, it is borderline. (D) Residuals vs. leverage (hat values). Most observations have leverage  $< 2k/n=0.047$ ; a few exhibit higher leverage ( $\sim 0.06$ ) but small residuals, indicating no unduly influential observations. LOESS, locally weighted smoothing; SE (HC3), heteroskedasticity-consistent standard errors (type HC3).

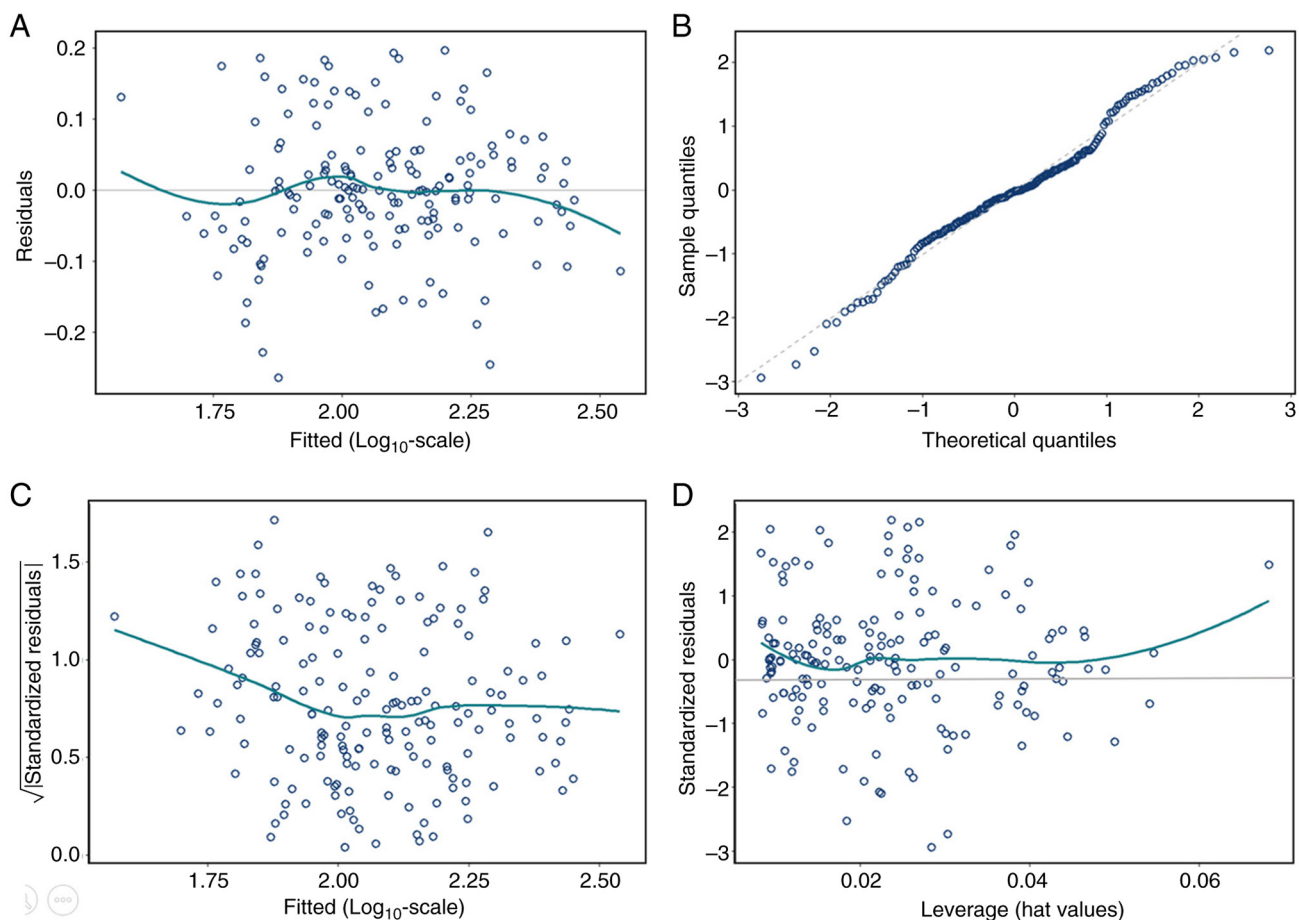

Figure S4. Component-plus-Residual (partial residual) plots for model  $M_6$ . (A)  $\text{Log}_{10}(\text{adjusted UPCR})$ : Linear pattern, LOESS overlaps the fitted line. (B) Age: Mild downward linear trend, no systematic curvature. (C) Sex: Upward shift for girls and no evidence of sex-specific heteroskedasticity. LOESS, locally weighted smoothing; UPCR, urine protein/creatinine ratio; 24hUP, 24-h urine protein.

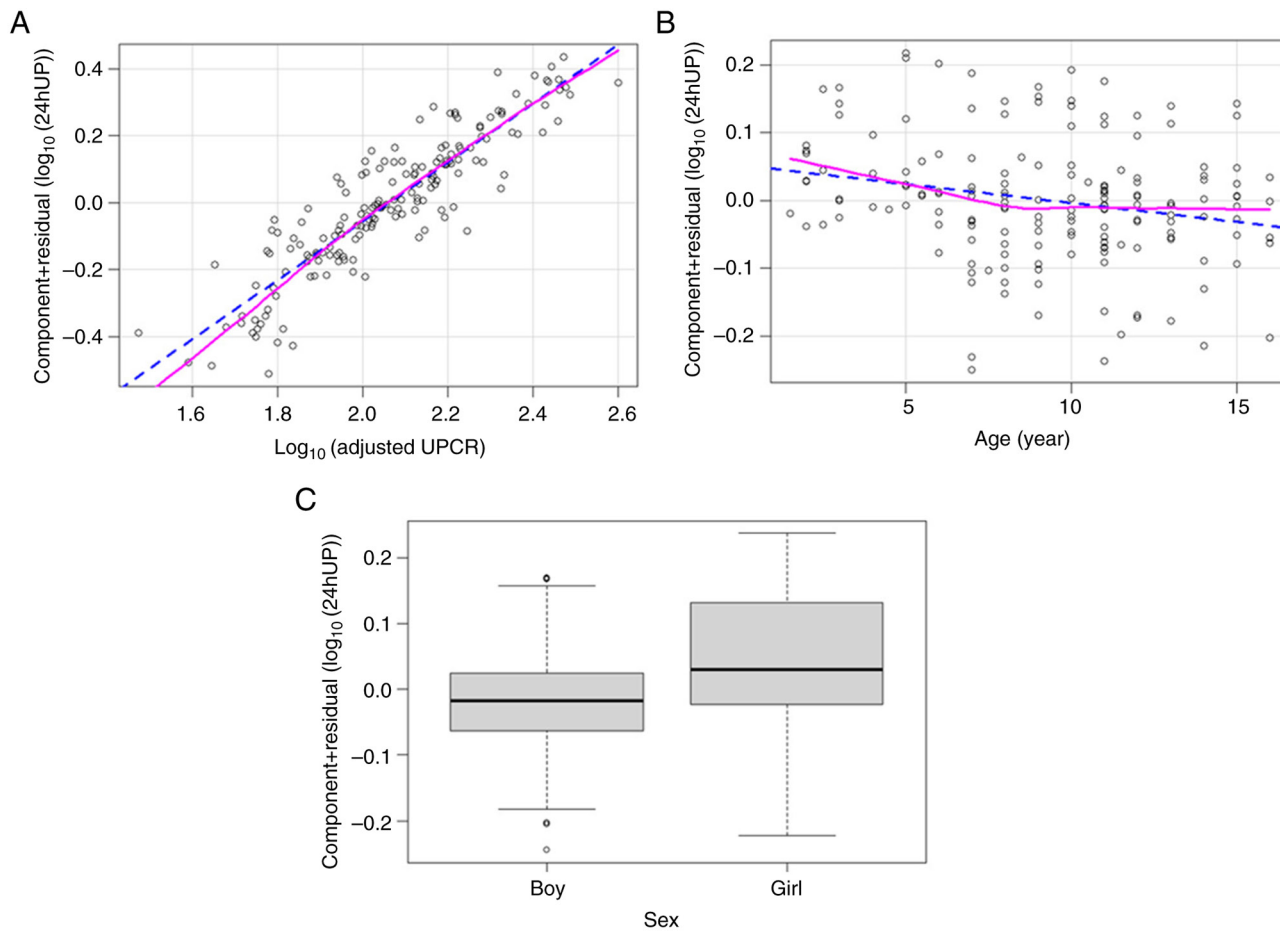

Figure S5. Decision curve analysis for the original M6 (external validation). (A) Threshold  $T=100 \text{ mg/m}^2/\text{h}$ ; (B) Threshold  $T=150 \text{ mg/m}^2/\text{h}$ . Events were defined as  $24\text{hUP} \geq T$ , with predicted risk derived from the original  $M_6$  model. Curves display net benefit per patient of the model, compared with treat-all and treat-none strategies, across a range of risk thresholds ( $pt=0.05-0.80$ ). The model consistently provided higher net benefit over both reference strategies across clinically relevant thresholds, supporting its potential clinical utility for guiding 24h urine collection decisions. DCA, decision-curve analysis;  $pt$ , risk threshold; 24hUP, 24-h urine protein.

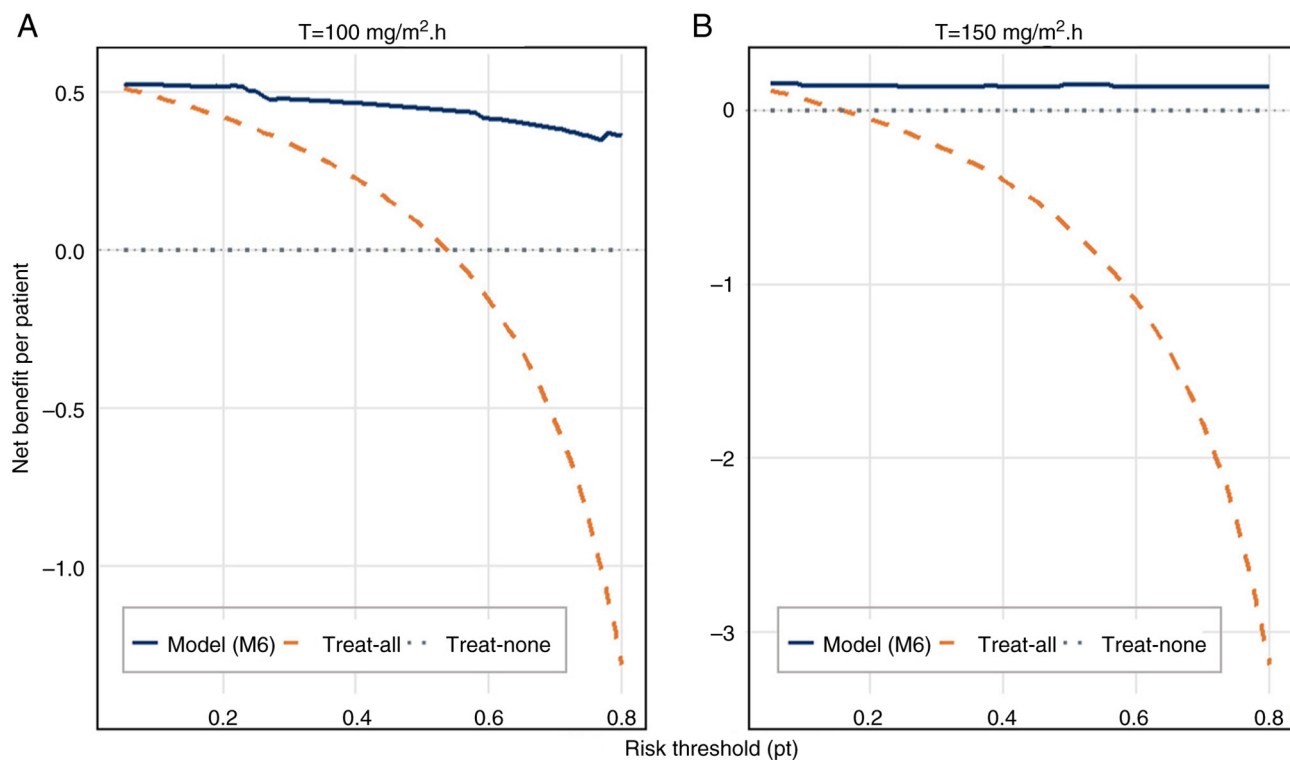

Supplement: Supplementary file 1 [file downloadSupplementary]
